# Supplementary material for: Starch-Derived Superabsorbent Polymer in Remediation of Solid Waste Sludge Based on Water–Polymer Interaction
Source: MDPI journal article supplement (doi:10.3390/polym15061471), 2023-03-16
Supplement: s1 [file s1]

Article

# Effect of Starch-Derived Superabsorbent Polymer on Water Retention and Absorbency Capability in Remediation of Solid Waste Sludge Based on Water/Polymer Interaction

Juan Matmin<sup>1,6\*</sup>, Salizatul Ilyana Ibrahim<sup>2</sup>, Mohd Hayrie Mohd Hatta<sup>3</sup>, Raidah Ricky @ Marzuki<sup>1</sup>, Khairulazhar Jumbri<sup>4</sup>, Nik Ahmad Nizam Nik Malek<sup>5,6</sup>

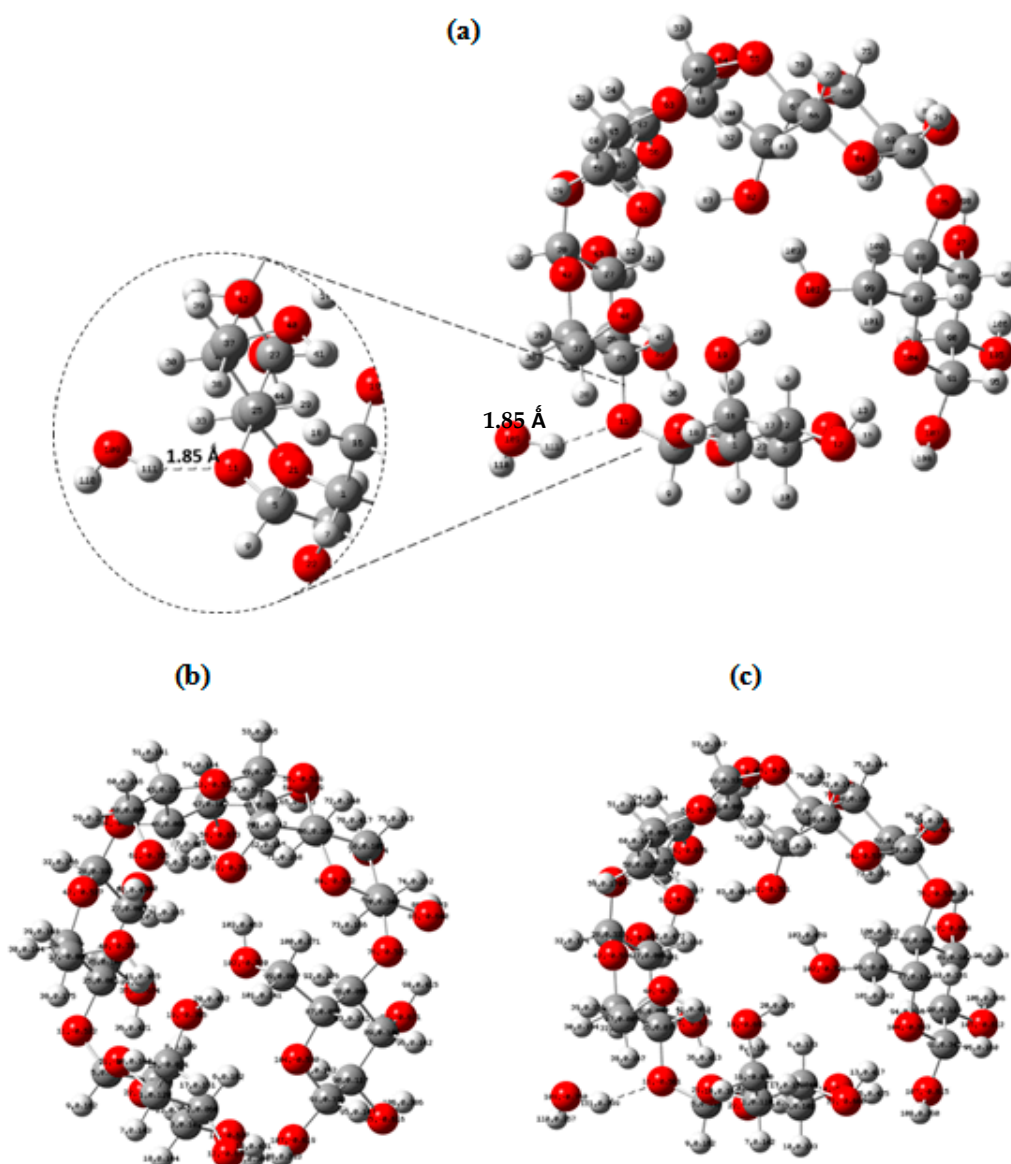

**Figure S1** DFT analysis on (a) H-bond of O11 with H111. The Mulliken Charge of amylose (b) without water and (c) with water

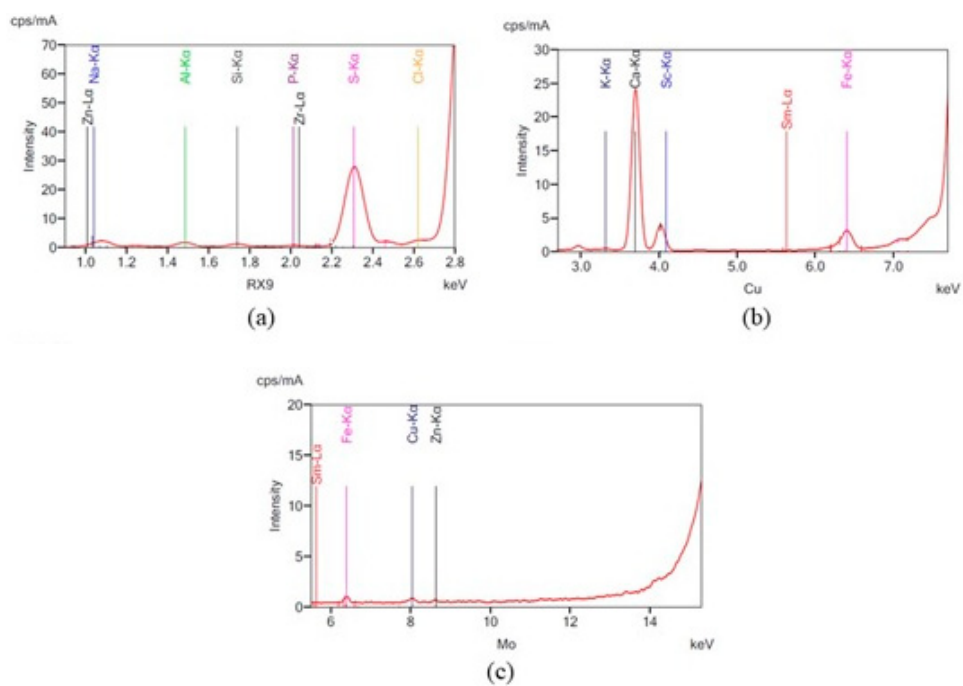

**Figure S2** XRF spectra for absorption of metals contaminants from sludge by NSS using (a) RX9 source, (b) Cu source, and (c) Mo source.
